# Supplementary material for: Breast hemangioma with difficulty in preoperative diagnosis: a case report
Source: World J Surg Oncol. 2014 Oct 14;12:313. doi: 10.1186/1477-7819-12-313 (PMC4200173; doi:10.1186/1477-7819-12-313)
Supplement: Supplementary file 1 — Additional file 1: Reported patients with hemangiomas of breast. (XLS 35 KB) [file 12957_2014_1781_MOESM1_ESM.xls]

## Sheet: Sheet2
	Reported patients of hemangiomas of breast
	Autor	Year	Age	Sex	Size (mm)	MMG	US	ABC/CNB	Preoperative diagnosis
1	Sebek	1984	72	F	18			Hematic material
2	Webb	1996	63	F	20	Well defined mass	Hypoechoic mass		Fibroadenoma
						Carcification (+)
3	Markopoulos	1997	73	F	50	Circumscribed lobular mass			Fibroadenoma
						Carcification (+)
4	Vuorela	1998	17	F	20	Circumscribed lobular mass	Hypoechoic mass
						Carcification (+)
5	Galindo	2001	52	F	20	Well defined mass		Hematic material	Hemangioma
						Carcification (-)
6	Aurello	2001	63	F	15	Circumscribed lobular mass	Hypoechoic mass		Fibroadenoma
						Carcification (-)
7	Siewert	2002	42	F	5	No lesion	Hypoechoic mass		Hematoma or cyst
						Carcification (-)	Vasucularity (+)
8	Mariscal	2002	60	F	15	Well defined mass		Hematic material	Carcinoma
						Carcification (-)
9	Chung	2002	29	F	10	Lobulated isodense mass	Hypoechoic mass		Carcinoma or fat necrosis
						Carcification (-)	Vasucularity (+)
10	Mesurolle	2003	78	F	10	Well defined mass	Hypoechoic mass	Hemangioma	Benign tumor
						Carcification (-)	Vasucularity (+)
11	Hayasaka	2003	70	F	20	Circumscribed lobular mass	Hypoechoic mass
						Carcification (+)
12	Kinoshita	2005	60	M	140			Hematic material	Malignant neoplasm or sarcoma
13	Kim	2006	50	F	15	Circumscribed lobular mass	Hypoechoic mass	Hemangioma	Malignant neoplasm
						Carcification (+)	Vasucularity (+)
14	Vourtsi	2006	77	M	60	Well defined mass		Hematic material	Benign tumor
						Carcification (-)
15	Adwani	2006	42	F	35	No lesion	Isoechoic mass	Adipose tissue	Hemangioma
						Carcification (-)
16	Kim	2007	56	F	14	Round, isodense mass	Hypoechoic mass	Hemangioma
						Carcification (-)	Vasucularity (-)
17	Dalfior	2008	65	F	20	Well defined mass		Hematic material
						Carcification (-)
18	Leddy	2009	60	M	15	Circumscribed lobular mass	Heterogeneous mass	Hemangioma	Carcinoma
						Carcification (-)	Vasucularity (-)
19	Kawatra	2009	38	F	40	Circumscribed lobular mass	Hypoechoic mass	Hematic material	Fibroadenoma
						Carcification (-)
20	Ferreira	2011	45	F	20	Mass	Hypoechoic mass		Carcinoma or hemangioma
						Carcification (-)	Vasucularity (+)
21	Tilve	2012	44	F	18	Well defined mass	Hypoechoic mass	Hematic material	Benign or low malignant tumor
						Carcification (+)
22	Tilve	2012	46	F	18	Circumscribed lobular mass	Hypoechoic mass	Hematic material
						Carcification (+)
23	Tilve	2012	82	F	7	Circumscribed lobular mass	Hypoechoic mass	Hemangioma
						Carcification (-)	Vasucularity (+)
24	Tilve	2012	78	F	17	Circumscribed lobular mass	Hypoechoic mass	Hemangioma
						Carcification (-)	Vasucularity (+)
25	Ameen	2012	33	F	7		Hypoechoic mass		Hemangioma
							Vasucularity (-)
26	Tadakoshi	2012	35	M	170
27	Present case		70	F	23	Circumscribed lobular mass	Hypoechoic mass	Hematic material	Carcinoma
						Carcification (-)
